# Supplementary material for: Metschnikowia pulcherrima and Related Pulcherrimin-Producing Yeasts: Fuzzy Species Boundaries and Complex Antimicrobial Antagonism
Source: PubMed Central journal article supplement (PMC7409158; doi:10.3390/microorganisms8071029), 2020-07-12
Supplement: microorganisms-08-01029-s001.pdf [file microorganisms-08-01029-s001.pdf]

**Table S1.** Accession numbers of D1/D2 sequences

| Designation                      | Mode of sequencing <sup>1</sup> | Accession number |
|----------------------------------|---------------------------------|------------------|
| <b><i>M. andauensis</i></b>      |                                 |                  |
| atype (CBS 10809 <sup>T</sup> )  | direct                          | AJ745110         |
| a77                              | cloned                          | KC411953         |
| a78                              | cloned                          | KC411954         |
| aa20                             | cloned                          | KC411955         |
| aa23                             | cloned                          | KC411956         |
| aa23a                            | cloned                          | KC411957         |
| ab24                             | cloned                          | KC411958         |
| ab27                             | cloned                          | KC411959         |
| <b><i>M. fructicola</i></b>      |                                 |                  |
| ftype (CBS 8853 <sup>T</sup> )   | direct                          | AF360542         |
| fb1                              | cloned                          | KC411962         |
| fb3                              | cloned                          | KC411963         |
| fb6                              | cloned                          | KC411964         |
| fb9                              | cloned                          | KC411965         |
| fb10                             | cloned                          | KC411966         |
| fb11                             | cloned                          | KC411967         |
| fc15                             | cloned                          | KC411968         |
| fc17                             | cloned                          | KC411969         |
| fc21                             | cloned                          | KC411970         |
| f39a1                            | cloned                          | KC411960         |
| f39b2                            | cloned                          | KC411961         |
| <b><i>M. pulcherrima</i></b>     |                                 |                  |
| ptype (CBS 5833 <sup>T</sup> )   | direct                          | U45736           |
| p18 (1mut8)                      | cloned                          | KM249361         |
| p19 (1mut9)                      | cloned                          | KM249362         |
| p110 (1mut10)                    | cloned                          | KM249363         |
| p215 (2mut15)                    | cloned                          | KM249364         |
| p217 (2mut17)                    | cloned                          | KM249365         |
| pa37                             | cloned                          | KM249366         |
| pa42                             | cloned                          | KM249367         |
| pa46                             | cloned                          | KM249368         |
| pb51                             | cloned                          | KM249369         |
| pb54                             | cloned                          | KM249370         |
| pb58                             | cloned                          | KM249371         |
| pc61                             | cloned                          | KM249372         |
| pc62                             | cloned                          | KM249373         |
| pc64                             | cloned                          | KM249374         |
| <b><i>M. shanxiensis</i></b>     |                                 |                  |
| shtype (CBS 10359 <sup>T</sup> ) | cloned                          | DQ367883         |
| shd8h14                          | cloned                          | KM350705         |
| shd8h16                          | cloned                          | KM350706         |
| shb2                             | cloned                          | KM350707         |

|                                                    |        |          |
|----------------------------------------------------|--------|----------|
| shd2                                               | cloned | KM350708 |
| Shd3d3                                             | cloned | KM350709 |
| Shd4                                               | cloned | KM350710 |
| sha                                                | cloned | KM350711 |
| shc                                                | cloned | KM350712 |
| shf                                                | cloned | KM350713 |
| <b><i>M. sinensis</i></b>                          |        |          |
| sitype (CBS 10357 <sup>T</sup> )                   | cloned | DQ367881 |
| sid6f2                                             | cloned | KM275352 |
| sid6f3                                             | cloned | KM275353 |
| sid6f4                                             | cloned | KM275354 |
| sib4                                               | cloned | KM275355 |
| sib10                                              | cloned | KM275356 |
| sie2                                               | cloned | KM275357 |
| sie3                                               | cloned | KM275358 |
| sie4                                               | cloned | KM275359 |
| sif9                                               | cloned | KM275360 |
| sif10                                              | cloned | KM275361 |
| sif11                                              | cloned | KM275362 |
| si21-1 (21-1)                                      | cloned | KM275363 |
| si214 (21-4)                                       | cloned | KM275364 |
| si215 (21-5)                                       | cloned | KM275365 |
| <b><i>M. zizyphicola</i></b>                       |        |          |
| ztype (CBS 10358 <sup>T</sup> )                    | cloned | DQ367882 |
| z d7g6                                             | cloned | KM275366 |
| zd7g7                                              | cloned | KM275367 |
| z d7g8                                             | cloned | KM275368 |
| za15                                               | cloned | KM275369 |
| za17                                               | cloned | KM275370 |
| za18                                               | cloned | KM275371 |
| z22a                                               | cloned | KM275372 |
| z22b                                               | cloned | KM275373 |
| z22f                                               | cloned | KM275374 |
| <b><i>M. citriensis</i></b>                        |        |          |
| ctype (FL01 <sup>T</sup> )                         | cloned | MF538699 |
| <b><i>M. persimmonesis</i></b>                     |        |          |
| petype (KCTC 12991BP <sup>T</sup> )                | cloned | MF446618 |
| <b><i>M. rubicola</i></b>                          |        |          |
| rtype (NRRL Y-6064 <sup>T</sup> )                  | cloned | MG050901 |
| <b><i>Candida (Metschnikowia) picachoensis</i></b> |        |          |

|                                     |        |          |
|-------------------------------------|--------|----------|
| Cpicach (CBS<br>9804 <sup>T</sup> ) | direct | AY452039 |
|-------------------------------------|--------|----------|

<sup>1</sup> direct: DNA amplified from genomic DNA; cloned: DNA cloned from amplified DNA
